# Supplementary material for: The Canine Morbillivirus Strain Associated with An Epizootic in Caspian Seals Provides New Insights into the Evolutionary History of this Virus
Source: MDPI journal article supplement (doi:10.3390/v11100894), 2019-09-25
Supplement: s1 [file s1]

Table S3. Genomic differences between the three recovered Caspian strain variants

| Region       | Nt<br>pos | AA<br>pos | Strain variant |    |         |    |         |    |
|--------------|-----------|-----------|----------------|----|---------|----|---------|----|
|              |           |           | PC00-46        |    | PC00-20 |    | PC00-21 |    |
|              |           |           | Nt             | AA | Nt      | AA | Nt      | AA |
| <b>N</b>     | 146       |           | G              |    | A       |    | A       |    |
|              | 1250      |           | C              |    | T       |    | T       |    |
|              | 1496      |           | C              |    | T       |    | C       |    |
| <b>P/V/C</b> | 2069      | 90        | C              | P  | T       | L  | T       | L  |
| <b>M</b>     | 3458      |           | A              |    | G       |    | G       |    |
| <b>F</b>     | 5311      | 126       | T              | M  | C       | T  | C       | T  |
|              | 5390      |           | C              |    | T       |    | C       |    |
|              | 6987      |           | T              |    | G       |    | G       |    |
| <b>H</b>     | 7320      |           | T              |    | C       |    | C       |    |
|              | 8308      | 410       | A              | I  | G       | M  | A       | I  |
| <b>L</b>     | 9752      |           | C              |    | T       |    | T       |    |
|              | 10148     |           | C              |    | T       |    | T       |    |
|              | 10523     |           | T              |    | T       |    | A       |    |
|              | 11276     |           | T              |    | T       |    | C       |    |
|              | 11423     |           | G              |    | A       |    | A       |    |
|              | 12266     |           | A              |    | G       |    | G       |    |
|              | 13427     |           | C              |    | T       |    | T       |    |
|              | 13808     |           | T              |    | C       |    | C       |    |
|              | 15035     |           | A              |    | G       |    | G       |    |

Blank spaces indicate no change or not applicable
