# Supplementary material for: The Canine Morbillivirus Strain Associated with An Epizootic in Caspian Seals Provides New Insights into the Evolutionary History of this Virus
Source: MDPI journal article supplement (doi:10.3390/v11100894), 2019-09-25
Supplement: s1 [file s1]

# SLAM

| Lineage   | Strain                               | Site I |     | Site II |     |     |     |     |     | Site III |     |     |     |     | Site IV |     |     |     |     |     |
|-----------|--------------------------------------|--------|-----|---------|-----|-----|-----|-----|-----|----------|-----|-----|-----|-----|---------|-----|-----|-----|-----|-----|
|           |                                      | 501    | 503 | 526     | 527 | 528 | 529 | 548 | 550 | 191      | 192 | 193 | 194 | 195 | 520     | 537 | 539 | 548 | 479 | 541 |
| PDV       | KC802221_PDV_WaddenSea_seal_NL_1988  | D      | D   | D       | V   | S   | R   | T   | P   | A        | T   | T   | S   | M   | Y       | Y   | Y   | T   | L   | P   |
| Caspian   | PC0046_seal_KZ_2000                  | D      | D   | D       | I   | S   | R   | T   | P   | A        | T   | T   | S   | V   | Y       | Y   | Y   | T   | L   | P   |
|           | PC0021_seal_AZ_2000                  | D      | D   | D       | I   | S   | R   | T   | P   | A        | T   | T   | S   | V   | Y       | Y   | Y   | T   | L   | P   |
|           | PC0020_seal_KZ_2000                  | D      | D   | D       | I   | S   | R   | T   | P   | A        | T   | T   | S   | V   | Y       | Y   | Y   | T   | L   | P   |
| America-1 | JN896987_SnyderHill_1950             | D      | D   | D       | I   | S   | R   | T   | P   | A        | T   | T   | S   | V   | Y       | Y   | Y   | T   | L   | P   |
|           | AF378705_Onderstepoort_1939          | D      | D   | D       | I   | S   | R   | T   | P   | A        | T   | T   | S   | V   | Y       | Y   | Y   | T   | L   | P   |
| Europe-1  | S460_raccoon_DE_2015                 | D      | D   | D       | I   | S   | R   | T   | P   | A        | T   | T   | S   | V   | Y       | Y   | Y   | T   | L   | P   |
|           | S466_raccoon_DE_2015                 | D      | D   | D       | I   | S   | R   | T   | P   | A        | T   | T   | S   | V   | Y       | Y   | Y   | T   | L   | P   |
|           | S272_fox_DE_2016                     | D      | D   | D       | I   | S   | R   | T   | P   | A        | T   | T   | S   | V   | Y       | Y   | Y   | T   | L   | P   |
|           | AY386315_5804_dogV_DE_1989           | D      | D   | D       | I   | S   | R   | T   | P   | A        | T   | T   | S   | V   | Y       | Y   | Y   | T   | L   | P   |
| America-3 | KF640687_R252_dogV_US_1974           | D      | D   | D       | I   | S   | R   | T   | P   | A        | T   | T   | S   | V   | Y       | Y   | Y   | T   | L   | P   |
| America-2 | KU666057_RhodeIsland_raccoon_US_2012 | D      | D   | D       | I   | S   | R   | T   | P   | A        | T   | T   | S   | V   | Y       | Y   | Y   | T   | L   | P   |
| Africa-1  | KU578256_SNP_lion_TZ_1994            | D      | D   | D       | V   | S   | R   | T   | P   | A        | T   | T   | S   | V   | Y       | Y   | Y   | T   | L   | P   |
| Asia-4    | MH496773_2_dog_TH_2014               | D      | D   | D       | I   | S   | R   | T   | P   | A        | T   | T   | S   | V   | Y       | Y   | Y   | T   | L   | P   |
| Arctic    | Baikal_seal_RU_1988                  | D      | D   | D       | I   | S   | R   | T   | P   | V        | T   | T   | S   | V   | Y       | Y   | Y   | T   | L   | P   |
|           | KX024708_11956_badger_IT_2015        | D      | D   | D       | I   | S   | R   | T   | P   | A        | T   | T   | S   | V   | Y       | Y   | Y   | T   | L   | P   |
| Asia-2    | AB475097_M25CR_dog_JP_2009           | D      | D   | D       | I   | S   | R   | T   | P   | A        | T   | T   | S   | V   | Y       | Y   | Y   | T   | L   | P   |
| Asia-1    | KC427278_Hebei_mink_CN_2008          | D      | D   | D       | I   | S   | R   | T   | P   | A        | T   | T   | S   | V   | Y       | Y   | Y   | T   | L   | P   |
|           | MK431532_NTU_dog_TW_2005             | D      | D   | D       | I   | S   | R   | T   | P   | A        | T   | T   | S   | V   | Y       | Y   | Y   | T   | L   | P   |
|           | MH496776_5_dog_TH_2014               | D      | D   | D       | I   | S   | R   | T   | P   | A        | T   | T   | S   | V   | Y       | Y   | Y   | T   | L   | P   |
|           | MF041963_CDV06_wolf_ET_2016          | D      | N   | D       | I   | S   | R   | T   | P   | A        | T   | T   | S   | V   | Y       | Y   | Y   | T   | L   | P   |
|           | KP765764_LN1_fox_CN_2010             | D      | D   | D       | I   | S   | R   | T   | P   | A        | T   | T   | S   | V   | Y       | Y   | Y   | T   | L   | P   |
|           | KP769803_Shaanxi_panda_CN_2015       | D      | D   | D       | I   | S   | R   | T   | P   | A        | T   | T   | S   | V   | Y       | Y   | Y   | T   | L   | P   |
|           | KP738610_SD11_raccoondog_CN_2014     | D      | D   | D       | I   | S   | R   | T   | P   | A        | T   | T   | S   | V   | Y       | Y   | Y   | T   | L   | P   |
|           | HM852904_MKYKM08_macaque_CN_2008     | D      | D   | D       | I   | S   | R   | T   | P   | A        | T   | T   | S   | V   | Y       | Y   | Y   | T   | L   | P   |
|           | LC342298_RC13_raccoon_JP_2016        | D      | D   | D       | I   | S   | R   | T   | P   | A        | T   | T   | S   | V   | Y       | Y   | Y   | T   | L   | P   |
| Africa-2  | KY971532_WT02_hyena_SA_2017          | D      | D   | D       | I   | S   | R   | T   | P   | A        | T   | T   | S   | I   | Y       | Y   | Y   | T   | L   | P   |

Sites are based on MV-H interaction with marmoset SLAM (Hashiguchi et al 2011)
