# Supplementary material for: The Canine Morbillivirus Strain Associated with An Epizootic in Caspian Seals Provides New Insights into the Evolutionary History of this Virus
Source: MDPI journal article supplement (doi:10.3390/v11100894), 2019-09-25
Supplement: s1 [file s1]

**Table S4.** Major recombination events identified by all detection methods in RDP4

| Recombinant<br>(Accession No.) | Major parent<br>(Accession No.)            | Minor parent<br>(Accession No.)                       | Breakpoint<br>positions | Detection methods ( <i>p</i> -value) |          |          |           |          |           |          |
|--------------------------------|--------------------------------------------|-------------------------------------------------------|-------------------------|--------------------------------------|----------|----------|-----------|----------|-----------|----------|
|                                |                                            |                                                       |                         | RDP                                  | GENECONV | BootScan | MaxChi    | Chimaera | SiScan    | 3Seq     |
| HLJ1 (JX681125)                | TH-8 (MH496779)<br>98.9% similarity        | Phoca/Caspian/<br>2007 (HM046486)<br>99.9% similarity | 12926 –<br>14264        | 1.58E-72                             | 3.39E-70 | 6.38E-73 | 1.75E-16  | 3.12E-16 | 1.66E-19  | 4.32E-11 |
| 2645 (AY445077)                | 2689 (AY649446)<br>98% similarity          | Snyder Hill<br>(JN896987)<br>98.9% similarity         | 7131 –<br>9032          | 2.85E-48                             | 7.68E-47 | 4.65E-50 | 2.89E-19  | 1.25E-05 | 8.31E-27  | 2.88E-11 |
| 2654 (AY466011)                |                                            |                                                       |                         |                                      |          |          |           |          |           |          |
| 2645 (AY542312)                |                                            |                                                       |                         |                                      |          |          |           |          |           |          |
| ZC (KJ994343)                  | PS (JN896331)<br>98% similarity            | Onderstepoort<br>(AF305419)<br>100% similarity        | 11586 –<br>12022        | 1.44E-32                             | 3.70E-31 | 9.45E-33 | 3.10E-05  | 2.46E-05 | 8.96E-07  | 4.32E-11 |
| 007Lm<br>(AB474397)            | 011C (AB476401)<br>99.5% similarity        | 2689 (AY649446)<br>99.8% similarity                   | 7054 –<br>7555          | 2.98E-27                             | 1.51E-25 | 2.09E-23 | 6.68E-08  | 1.80E-07 | 2.58E-07  | 2.88E-11 |
| 007Lm<br>(AB474397)            | 011C (AB476401)<br>99.7% similarity        | 2689 (AY649446)<br>99.9% similarity                   | 9794 –<br>10563         | 1.68E-27                             | 2.21E-26 | 1.59E-27 | 1.18E-06  | 1.16E-06 | 5.22E-07  | 2.88E-11 |
| 2689 (AY649446)                | 2601 (AY443350)<br>99% similarity          | 164071<br>(EU716337)<br>99.8% similarity              | 4940 –<br>6962          | 4.32E-19                             | 6.93E-18 | 1.56E-20 | 2.20E-11  | 1.54E-12 | 4.91E-13  | 2.28E-16 |
| ZC (KJ994343)                  | Unknown strain<br>(171391513_KJ1237<br>71) | 164071<br>(EU716337)<br>99.4% similarity              | 12925 –<br>14137        | 1.06E-10                             | 3.56E-10 | 5.50E-08 | 1.74E-08  | 2.95E-08 | 5.27E-06  | 2.02E-07 |
| 171391513<br>(KJ123771)        | Unknown strain<br>(A7517_AF164967)         | 164071<br>(EU716337)<br>100% similarity               | 2008 –<br>5718          | 6.70E-09                             | 5.90E-07 | 6.74E-09 | 9.54E-06  | 3.78E-05 | 3.37E-05  | 2.43E-06 |
| 2654 (AY466011)                | 164071<br>(EU716337)<br>97.8% similarity   | CDV3 (EU726268)<br>99.5% similarity                   | 2134 –<br>2556          | 1.26E-07                             | 3.95E-07 | 1.35E-07 | 1.63E-03  | 4.87E-04 | 7.20E-03  | 1.60E-04 |
| CDV4_TH<br>(MH496775)          | CDV8_TH<br>(MH496779)<br>99% similarity    | 171391513<br>(KJ123771)<br>100% similarity            | 8250 –<br>8987          | 7.05E-09                             | 1.71E-10 | 5.96E-12 | 0.0446697 | NS       | 0.0001756 | 2.14E-06 |
